# Supplementary material for: Structural and physico-chemical characterization of hybrid materials based on globular quinuclidinium cation derivatives and tetrachloridocobaltate(ii) anions
Source: Royal Society of Chemistry journal article supplement (doi:10.1039/d3ce00759f), 2023-11-08
Supplement: d3ce00759f1.pdf [file d3ce00759f1.pdf]

## SUPPLEMENTARY INFORMATION

### Structural and Physico-Chemical Characterization of Hybrid Materials Based on Globular Quinuclidinum Cations Derivatives and Tetrachloridocobaltate(II) Anions

Cantia Belloso-Casuso,<sup>a,b,c</sup> Imanol de Pedro,<sup>\*a</sup> Laura Canadillas-Delgado,<sup>b</sup> Garikoitz Beobide,<sup>d,e</sup> Manuel Sánchez-Andújar,<sup>f</sup> Javier García Ben,<sup>f</sup> Julian Walker,<sup>g</sup> Palmerina González Izquierdo,<sup>a</sup> Israel Cano,<sup>h</sup> Jesus Rodríguez Fernández <sup>a</sup> and Oscar Fabelo<sup>\*b</sup>

<sup>a</sup> CITIMAC, Facultad de Ciencias, Universidad de Cantabria, 39005 Santander.

<sup>b</sup> Institut Laue-Langevin, BP 156X, F-38042 Grenoble Cedex, France.

<sup>c</sup> Instituto de Ciencia de Materiales de Madrid (ICMM-CSIC), 28049 Madrid, Spain

<sup>d</sup> Departamento de Química Orgánica e Inorgánica, Facultad de Ciencia y Tecnología, Universidad del País Vasco, Apartado 644, E-48080, Bilbao, Spain.

<sup>e</sup> Basque Ctr Mat Applicat & Nanostruct, BCMat, UPV EHU Sci Pk, Leioa 48940, Spain.

<sup>f</sup> QuiMolMat Group, Department of Chemistry, Faculty of Science and Advanced Scientific Research Center (CICA), Zapateira, University of A Coruna, 15071 A Coruna, Spain.

<sup>g</sup> Department of Materials Science and Engineering, Norwegian University of Science and Technology, NO-7491 Trondheim, Norway

<sup>h</sup> Departamento de Química Inorgánica, Facultad de Ciencias Químicas, Universidad Complutense de Madrid, 28040 Madrid, Spain

## Content

**Scheme 1:** View of the chemical structure of the organic. Color codes: brown, carbon; red, oxygen; light blue, nitrogen; pink, hydrogen,

**Fig. S1.** TGA analysis A, B and C materials

**Fig. S2.** 2D view of SC-XRPD data of A, B and C from RT to 450 K upon a heating cooling mode showing the crystal phase transitions.

**Fig. S3.** Rietveld refinement of compound A at 400 K.

**Fig. S4.** Evolution of the cell parameters and cell volume obtained from the pattern matching of the SC-XRPD data for A, B and C.

**Fig. S5.** dielectric permittivity vs frequency of compound B at different temperatures.

**Fig. S6.** Impedance complex plane plots and equivalent circuits obtained for compound B at different temperatures.

**Fig. S7.** UV spectrum of A, B, C and  $\text{CoCl}_2$  compounds

**Table S1.** Crystallographic data and refinement details of SCXRD of A, B and C compounds at 100 K.

**Table S2.** Crystallographic data and refinement details of SC-XRD of A compound at 400 K.

**Table S3.** Bond lengths ( $\text{\AA}$ ) obtained from crystallographic data and refinement details of SC-XRD of A, B and C compounds at 300 K.

**Table S4.** Bond lengths ( $\text{\AA}$ ) obtained from crystallographic data and refinement details of SC-XRD of A, B and C compounds at 100 K.

**Table S5.** **Table S5.** Crystallographic data and refinement details of SCXRD of C compounds at 400 K.

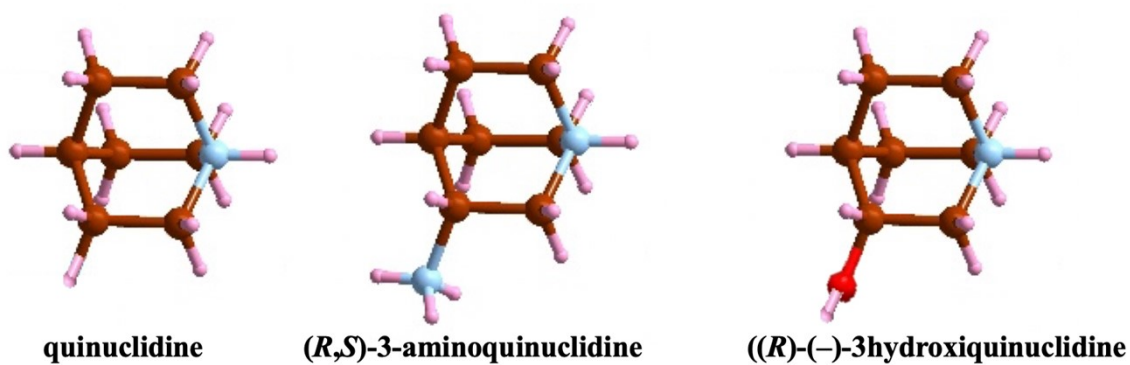

**Scheme 1:** View of the chemical structure of the organic. Color codes: brown, carbon; red, oxygen; light blue, nitrogen; pink, hydrogen,

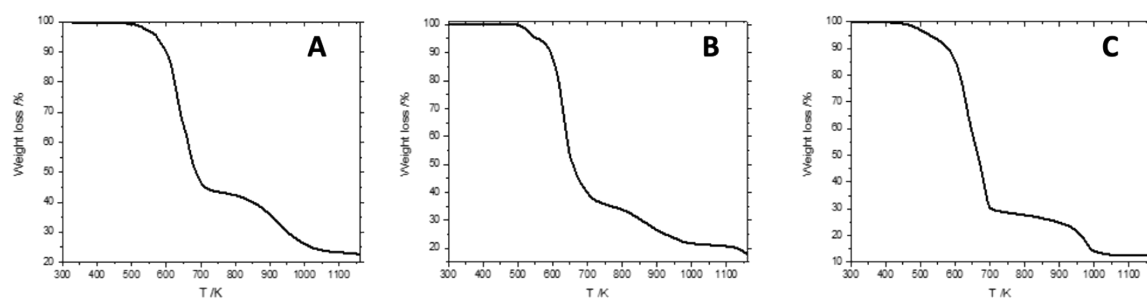

**Fig. S1.** TGA analysis for compounds **A**, **B** and **C**.

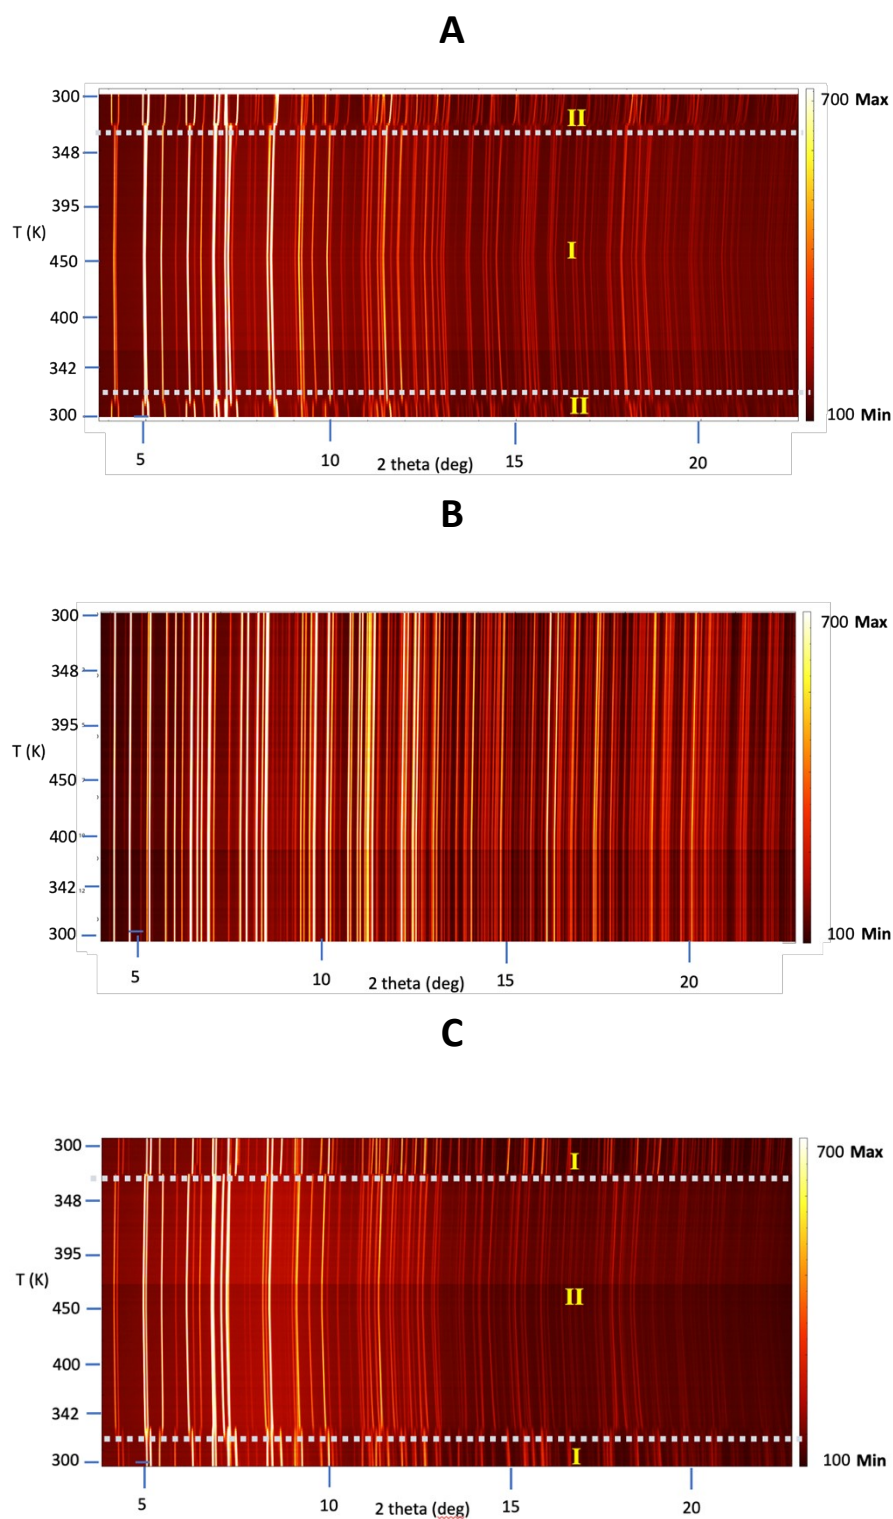

**Fig. S2.** 2D view of SC-XRPD data of compound **A**, **B** and **C** from RT to 450 K upon a heating cooling mode showing the crystal phase transitions from phase II to I.

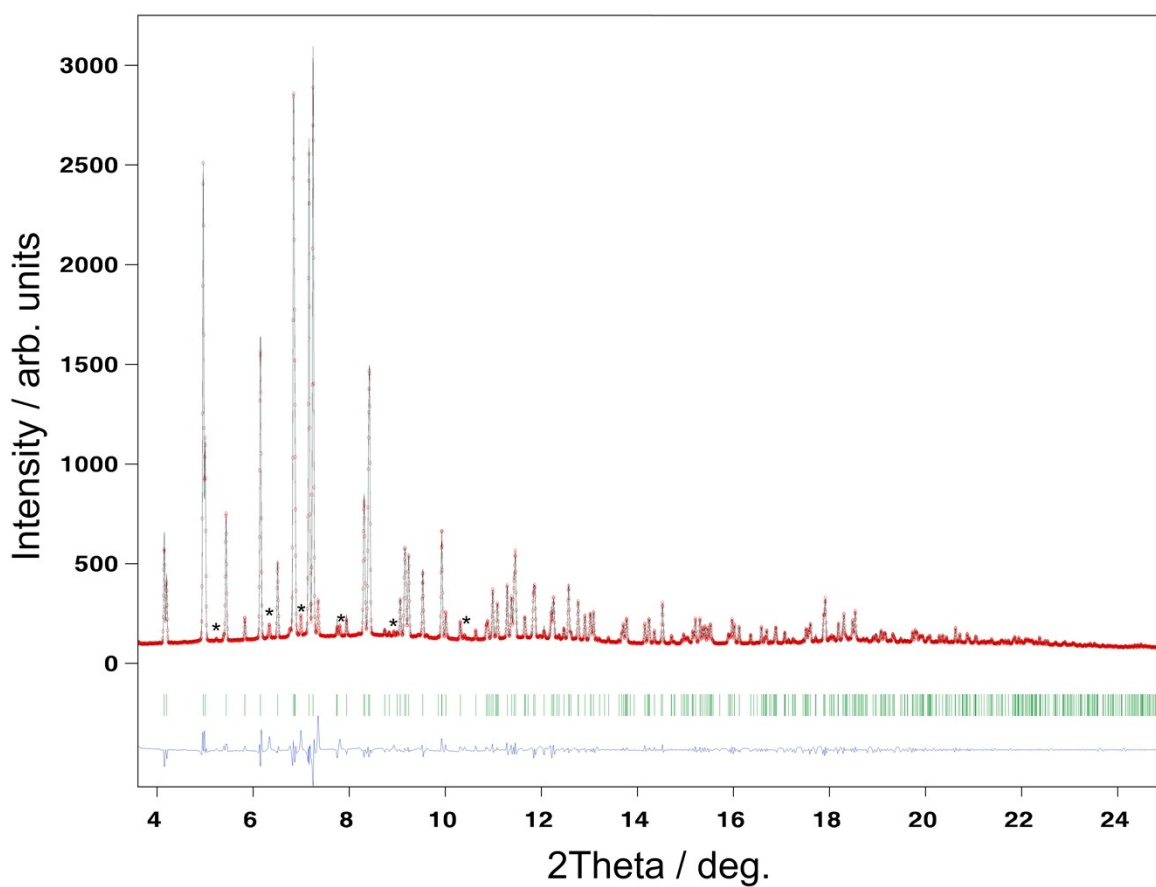

**Fig. S3.** Rietveld refinement of compound **A** at 400 K. The main impurity peaks are highlighted with an asterisk symbol.

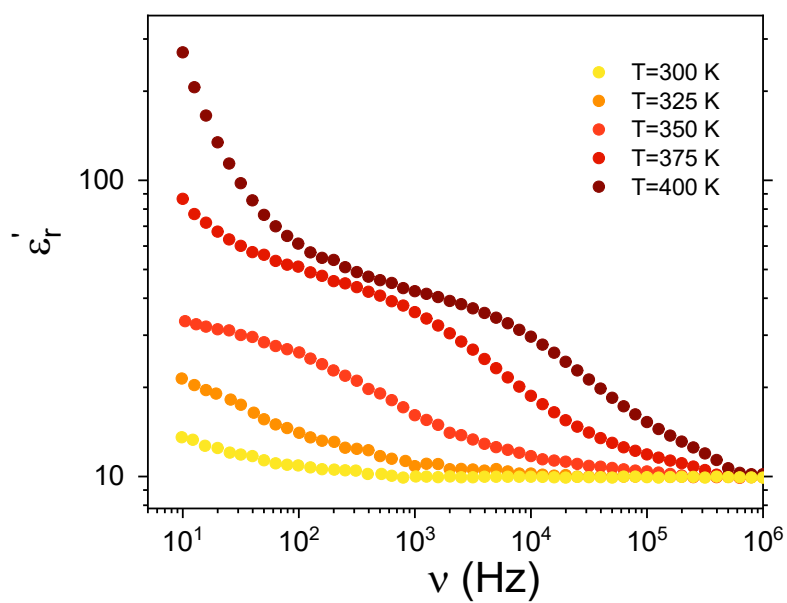

**Fig. S4** Frequency dependence of the  $\epsilon'_r$  values of **B** at different temperatures

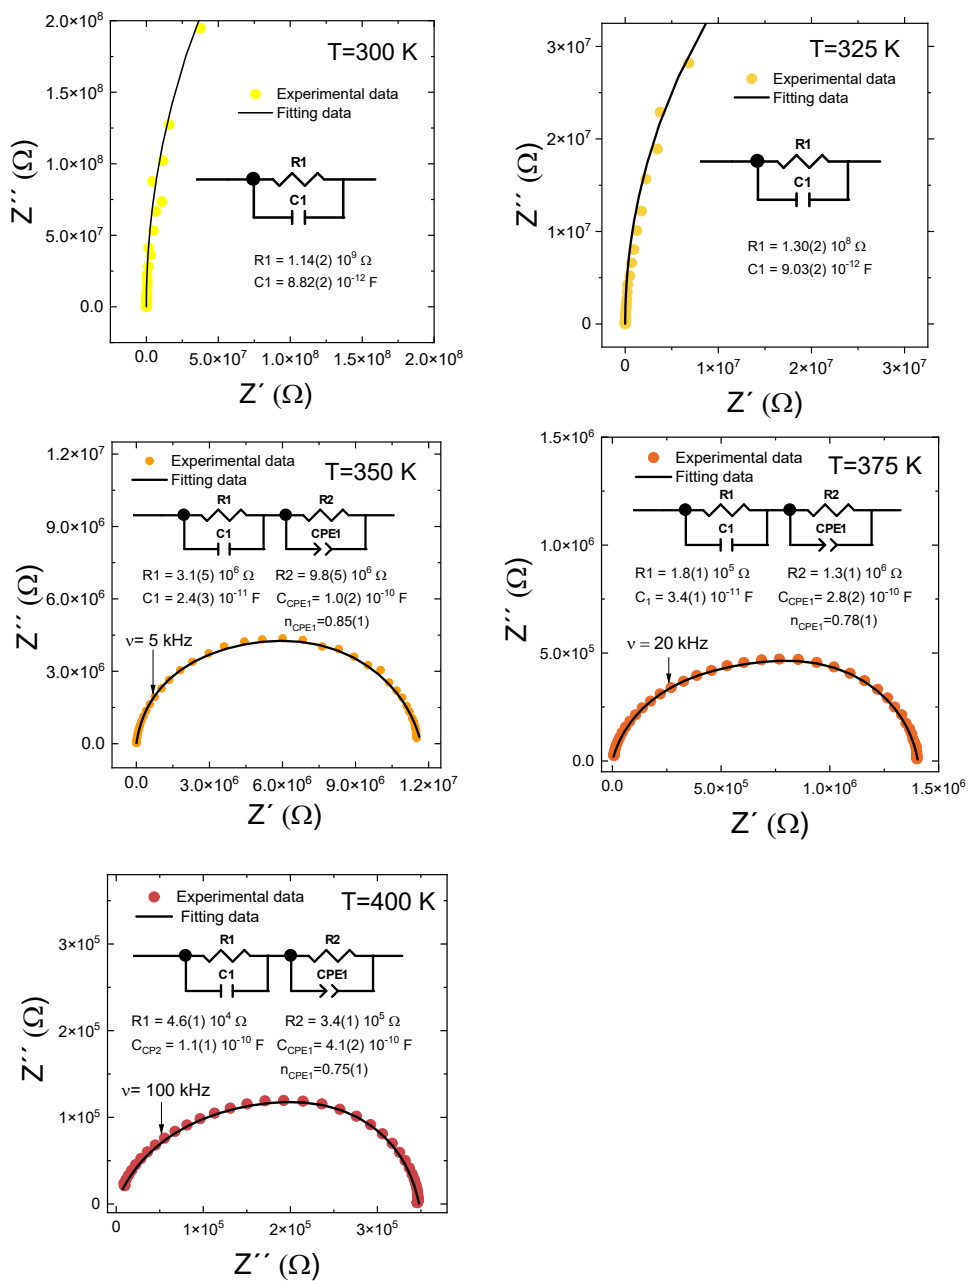

**Fig. S5.** Impedance complex plane plots and equivalent circuits obtained for compound **B** at different temperatures.

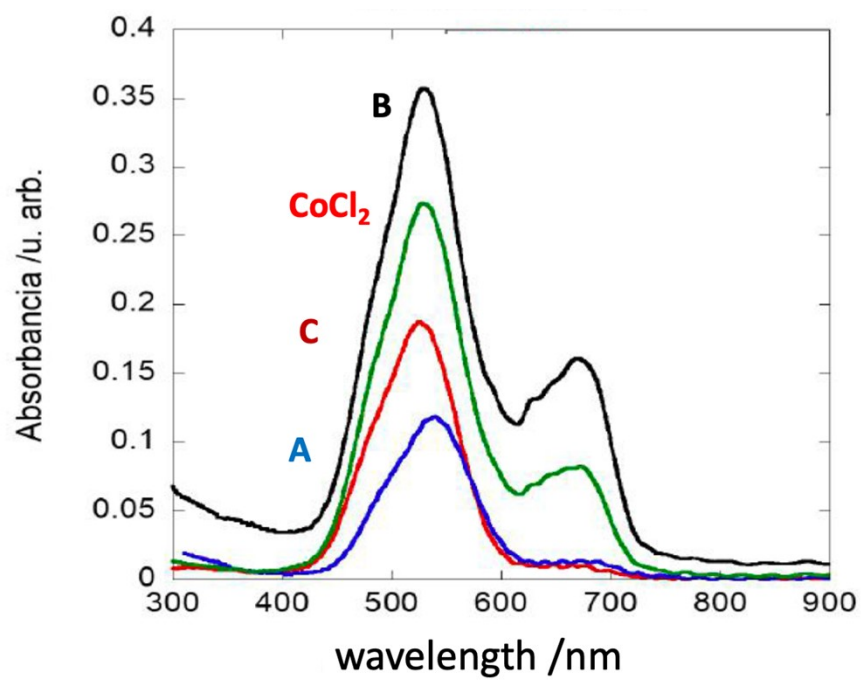

Fig.S6. UV spectrum of A, B, C and  $\text{CoCl}_2$  compounds

**Table S1.** Crystallographic data and refinement details of SCXRD of **A** at 400 K.

---

|                            | <b>A</b>       |
|----------------------------|----------------|
| Cryst. Syst.               | orthorhombic   |
| Space group                | <i>P n m a</i> |
| <i>a</i> (Å)               | 12.69091(6)    |
| <i>b</i> (Å)               | 9.63357(4)     |
| <i>c</i> (Å)               | 16.43013(8)    |
| $\alpha$ (°)               | 90             |
| $\beta$ (°)                | 90             |
| $\gamma$ (°)               | 90             |
| <i>V</i> (Å <sup>3</sup> ) | 2008.728(17)   |
| <i>Z</i>                   | 4              |
| $\lambda$ (Å)              | 0.601840       |
| Temperature (K)            | 400(2)         |
| Number of points           | 4994           |
| 2theta range min           | 0.03400        |
| 2theta range max           | 26.14904       |
| R factor (%)               | 4.8311         |
| wR factor (%)              | 6.7023         |
| Number reflns              | 623            |
| Number parameters          | 74             |



**Table S2.** Crystallographic data and refinement details of SCXRD of compounds **A**, **B** and **C** at 100 K.

|                                                  | <b>A</b>                                                                     | <b>B</b>                                                                   | <b>C</b>                                                                                       |
|--------------------------------------------------|------------------------------------------------------------------------------|----------------------------------------------------------------------------|------------------------------------------------------------------------------------------------|
| Formula                                          | C <sub>14</sub> H <sub>28</sub> N <sub>2</sub> CoCl <sub>4</sub>             | C <sub>7</sub> H <sub>16</sub> N <sub>2</sub> CoCl <sub>4</sub>            | C <sub>42</sub> H <sub>84</sub> N <sub>6</sub> O <sub>6</sub> Co <sub>3</sub> Cl <sub>12</sub> |
| M (g mol <sup>-1</sup> )                         | 425.11                                                                       | 328.95                                                                     | 1371.34                                                                                        |
| Cryst. Syst.                                     | monoclinic                                                                   | monoclinic                                                                 | orthorhombic                                                                                   |
| Space group                                      | <i>P</i> 2 <sub>1</sub> / <i>n</i>                                           | <i>P</i> c                                                                 | <i>P</i> 2 <sub>1</sub> 2 <sub>1</sub> 2 <sub>1</sub>                                          |
| <i>a</i> (Å)                                     | 9.4413(3)                                                                    | 6.4979(4)                                                                  | 9.5314(12)                                                                                     |
| <i>b</i> (Å)                                     | 12.1521(5)                                                                   | 16.0144(10)                                                                | 15.705(2)                                                                                      |
| <i>c</i> (Å)                                     | 16.2434(7)                                                                   | 12.9534(8)                                                                 | 38.490(5)                                                                                      |
| $\alpha$ (°)                                     | 90                                                                           | 90                                                                         | 90                                                                                             |
| $\beta$ (°)                                      | 93.5690(10)                                                                  | 91.907(2)                                                                  | 90                                                                                             |
| $\gamma$ (°)                                     | 90                                                                           | 90                                                                         | 90                                                                                             |
| V (Å <sup>3</sup> )                              | 1860.02(13)                                                                  | 1347.18(14)                                                                | 5761.6(12)                                                                                     |
| Z                                                | 4                                                                            | 4                                                                          | 4                                                                                              |
| $\rho_{\text{calc}}$ (g·cm <sup>-3</sup> )       | 1.518                                                                        | 1.711                                                                      | 1.581                                                                                          |
| Colour                                           | purple                                                                       | purple                                                                     | purple                                                                                         |
| F(000)                                           | 884                                                                          | 708                                                                        | 2844                                                                                           |
| $\mu$ (cm <sup>-1</sup> )                        | 7.70                                                                         | 10.44                                                                      | 122.03                                                                                         |
| $\theta$ range                                   | 1.65 to 23.63°                                                               | 1.00 to 23.78                                                              | 2.30 to 72.64                                                                                  |
| HKL range                                        | -13 $\leq$ h $\leq$ 13,<br>-17 $\leq$ k $\leq$ 17,<br>-22 $\leq$ l $\leq$ 23 | -9 $\leq$ h $\leq$ 9,<br>-23 $\leq$ k $\leq$ 23,<br>-18 $\leq$ l $\leq$ 18 | -11 $\leq$ h $\leq$ 11,<br>-19 $\leq$ k $\leq$ 19,<br>-47 $\leq$ l $\leq$ 38                   |
| Meas./indep. refl.                               | 18631/5664                                                                   | 27640/8005                                                                 | 50126/11022                                                                                    |
| R <sub>eqv.</sub>                                | 0.0723                                                                       | 0.01134                                                                    | 0.0841                                                                                         |
| Obs. refl. [ <i>I</i> > 2 $\sigma$ ( <i>I</i> )] | 4430                                                                         | 4125                                                                       | 9067                                                                                           |
| R, R <sub>w</sub>                                | 0.0434, 0.0989                                                               | 0.0650, 0.0296                                                             | 0.0968, 0.2780                                                                                 |
| R, R <sub>w</sub> (all)                          | 0.0602, 0.1095                                                               | 0.0645, 0.9286                                                             | 0.1156, 0.3031                                                                                 |
| of (S)                                           | 1.062                                                                        | 1.325                                                                      | 1.151                                                                                          |
| Parameters                                       | 190                                                                          | 253                                                                        | 623                                                                                            |
| Máx./min. $\Delta\rho$ (e Å <sup>-3</sup> )      | 0.491/-0.612                                                                 | 1.560/-0.484                                                               | 1.746/-0.923                                                                                   |
| $\lambda$ (Å)                                    | 0.56086                                                                      | 0.56086                                                                    | 1.54178                                                                                        |
| Temperature (K)                                  | 100(2)                                                                       | 100(2)                                                                     | 100(2)                                                                                         |

**Table S3.** Main bond lengths (Å) and angles (°) obtained from crystallographic data and refinement details of SCXRD of A, B and C compounds at 300 K.

| <b>Compound A</b><br><b>Bond lengths (Å)</b> |            |
|----------------------------------------------|------------|
| Co1-Cl1                                      | 2.2546(16) |
| Co1-Cl3                                      | 2.2803(15) |
| Co1-Cl4                                      | 2.2673(17) |
| Co1-Cl2                                      | 2.2810(16) |

| <b>Compound A</b><br><b>Bond angles (°)</b> |           |
|---------------------------------------------|-----------|
| Cl1-Co1-Cl4                                 | 113.26(7) |
| Cl4-Co1-Cl3                                 | 106.81(6) |
| Cl4-Co1-Cl2                                 | 112.86(7) |
| Cl1-Co1-Cl3                                 | 110.31(7) |
| Cl1-Co1-Cl2                                 | 105.75(7) |
| Cl3-Co1-Cl2                                 | 107.75(6) |

| <b>Compound B</b><br><b>Bond lengths (Å)</b> |            |
|----------------------------------------------|------------|
| Co1-Cl1                                      | 2.274(2)   |
| Co1-Cl2                                      | 2.2784(16) |
| Co1-Cl3                                      | 2.2865(3)  |
| Co1-Cl4                                      | 2.260(3)   |
| Co2-Cl5                                      | 2.287(3)   |
| Co2-Cl6                                      | 2.274(2)   |
| Co2-Cl7                                      | 2.2741(16) |
| Co2-Cl8                                      | 2.259(3)   |

| <b>Compound B</b><br><b>Bond angles (°)</b> |            |
|---------------------------------------------|------------|
| Cl1-Co1-Cl2                                 | 108.13(7)  |
| Cl1-Co1-Cl3                                 | 111.71(9)  |
| Cl1-Co1-Cl4                                 | 103.38(9)  |
| Cl2-Co1-Cl3                                 | 114.96(8)  |
| Cl2-Co1-Cl4                                 | 107.01(7)  |
| Cl3-Co1-Cl4                                 | 111.67(8)  |
| Cl5-Co2-Cl6                                 | 111.24(10) |
| Cl5-Co2-Cl7                                 | 109.08(8)  |
| Cl5-Co2-Cl8                                 | 104.41(9)  |
| Cl6-Co2-Cl7                                 | 106.95(8)  |
| Cl6-Co2-Cl8                                 | 110.31(7)  |
| Cl7-Co2-Cl8                                 | 114.79(6)  |

| <b>Compound C</b><br><b>Bond lengths (Å)</b> |            |
|----------------------------------------------|------------|
| Co1-Cl2                                      | 2.2576(13) |
| Co1-Cl1                                      | 2.2857(19) |
| Co1-Cl3                                      | 2.2640(13) |
| Co1-Cl4                                      | 2.3000(19) |

| <b>Compound C</b><br><b>Bond angles (°)</b> |           |
|---------------------------------------------|-----------|
| Cl2-Co1-Cl3                                 | 113.94(5) |
| Cl3-Co1-Cl1                                 | 108.06(8) |
| Cl3-Co1-Cl4                                 | 111.67(8) |
| Cl2-Co1-Cl1                                 | 110.61(8) |
| Cl2-Co1-Cl4                                 | 105.70(8) |
| Cl1-Co1-Cl4                                 | 106.64(7) |

**Table S4.** Main bond lengths (Å) and angles (°) obtained from crystallographic data and refinement details of SCXRD of A, B and C compounds at 100 K.

| <b>Compound A</b><br><b>Bond lengths (Å)</b> |           |
|----------------------------------------------|-----------|
| Co1-Cl1                                      | 2.2707(7) |
| Co1-Cl3                                      | 2.2785(7) |

|         |           |
|---------|-----------|
| Co1-Cl2 | 2.2742(7) |
| Co1-Cl4 | 2.2901(7) |

| <b>Compound A</b><br><b>Bond angles (°)</b> |           |
|---------------------------------------------|-----------|
| Cl1-Co1-Cl2                                 | 111.45(3) |
| Cl2-Co1-Cl3                                 | 105.91(3) |

|             |           |
|-------------|-----------|
| Cl2-Co1-Cl4 | 108.36(3) |
| Cl1-Co1-Cl3 | 113.87(3) |
| Cl1-Co1-Cl4 | 103.95(3) |
| Cl3-Co1-Cl4 | 113.31(3) |

| <b>Compound B</b><br><b>Bond lengths (Å)</b> |            |
|----------------------------------------------|------------|
| Co1-Cl1                                      | 2.280(3)   |
| Co1-Cl2                                      | 2.2804(11) |
| Co1-Cl3                                      | 2.260(3)   |
| Co1-Cl4                                      | 2.256(5)   |
| Co2-Cl5                                      | 2.300(2)   |
| Co2-Cl6                                      | 2.2765(11) |
| Co2-Cl7                                      | 2.275(4)   |
| Co2-Cl8                                      | 2.276(3)   |

|             |           |
|-------------|-----------|
| Cl6-Co2-Cl8 | 107.06(8) |
| Cl7-Co2-Cl8 | 114.79(6) |

| <b>Compound B</b><br><b>Bond angles (°)</b> |            |
|---------------------------------------------|------------|
| Cl1-Co1-Cl2                                 | 107.74(8)  |
| Cl1-Co1-Cl3                                 | 112.07(14) |
| Cl1-Co1-Cl4                                 | 103.61(12) |
| Cl2-Co1-Cl3                                 | 106.61(8)  |
| Cl2-Co1-Cl4                                 | 115.81(10) |
| Cl3-Co1-Cl4                                 | 111.67(8)  |
| Cl5-Co2-Cl6                                 | 108.90(9)  |
| Cl5-Co2-Cl7                                 | 112.12(19) |
| Cl5-Co2-Cl8                                 | 110.68(16) |
| Cl6-Co2-Cl7                                 | 110.28(14) |

| <b>Compound C</b><br><b>Bond lengths (Å)</b> |          |          |          |
|----------------------------------------------|----------|----------|----------|
| Co1-Cl4                                      | 2.262(3) | Co1-Cl3  | 2.266(3) |
| Co1-Cl1                                      | 2.298(3) | Co1-Cl2  | 2.303(3) |
| Co2-Cl6                                      | 2.265(3) | Co2-Cl7  | 2.261(3) |
| Co2-Cl5                                      | 2.294(3) | Co2-Cl8  | 2.314(3) |
| Co3-Cl12                                     | 2.261(3) | Co3-Cl11 | 2.260(3) |
| Co3-Cl10                                     | 2.288(3) | Co3-Cl9  | 2.312(3) |

| <b>Compound C</b><br><b>Bond angles (°)</b> |            |              |            |
|---------------------------------------------|------------|--------------|------------|
| Cl4-Co1-Cl3                                 | 113.88(11) | Cl4-Co1-Cl1  | 109.46(10) |
| Cl3-Co1-Cl1                                 | 109.16(11) | Cl4-Co1-Cl2  | 106.57(11) |
| Cl3-Co1-Cl2                                 | 111.06(11) | Cl1-Co1-Cl2  | 106.42(11) |
| Cl6-Co2-Cl7                                 | 113.37(11) | Cl6-Co2-Cl5  | 108.00(12) |
| Cl7-Co2-Cl5                                 | 110.36(12) | Cl6-Co2-Cl8  | 113.62(11) |
| Cl7-Co2-Cl8                                 | 105.67(11) | Cl5-Co2-Cl8  | 105.55(12) |
| Cl12-Co3-Cl11                               | 114.40(11) | Cl12-Co3-Cl9 | 111.86(11) |
| Cl11-Co3-Cl9                                | 104.29(11) | Cl10-Co3-Cl9 | 107.13(12) |

**Table S5.** Crystallographic data and refinement details of SCXRD of **C** compounds at 400 K.

| <b>C</b>                                         |                                                                                                |
|--------------------------------------------------|------------------------------------------------------------------------------------------------|
| Formula                                          | C <sub>42</sub> H <sub>83</sub> N <sub>6</sub> O <sub>6</sub> Co <sub>6</sub> Cl <sub>12</sub> |
| M (g mol <sup>-1</sup> )                         | 1370.33                                                                                        |
| Cryst. Syst.                                     | orthorhombic                                                                                   |
| Space group                                      | <i>P n m a</i>                                                                                 |
| <i>a</i> (Å)                                     | 12.8461(13)                                                                                    |
| <i>b</i> (Å)                                     | 9.8389(9)                                                                                      |
| <i>c</i> (Å)                                     | 16.5685(18)                                                                                    |
| $\alpha$ (°)                                     | 90                                                                                             |
| $\beta$ (°)                                      | 90                                                                                             |
| $\gamma$ (°)                                     | 90                                                                                             |
| V (Å <sup>3</sup> )                              | 2094.1(4)                                                                                      |
| Z                                                | 4                                                                                              |
| $\rho_{\text{calc}}$ (g·cm <sup>-3</sup> )       | 1.54178                                                                                        |
| Colour                                           |                                                                                                |
| F(000)                                           | 2840                                                                                           |
| $\mu$ (cm <sup>-1</sup> )                        | 335.74                                                                                         |
| $\theta$ range                                   | 4.36 to 43.93                                                                                  |
| HKL range                                        | -9<= <i>h</i> <=11,<br>-8<= <i>k</i> <=5,<br>-12<= <i>l</i> <=14                               |
| Meas./indep. refl.                               | 3290/822                                                                                       |
| R <sub>eqv.</sub>                                | 0.0554                                                                                         |
| Obs. refl. [ <i>I</i> > 2 $\sigma$ ( <i>I</i> )] | 253                                                                                            |
| R, R <sub>w</sub>                                | 0.2051, 0.4573                                                                                 |
| R, R <sub>w</sub> (all)                          | 0.2599, 0.4828                                                                                 |
| Gof (S)                                          | 1.047                                                                                          |
| Parameters                                       | 40                                                                                             |
| Máx./min. $\Delta\rho$ (e Å <sup>-3</sup> )      | 0.558/-0.971                                                                                   |
| $\lambda$ (Å)                                    | 1.54178                                                                                        |
| Temperature (K)                                  | 400(2)                                                                                         |
